# Supplementary material
Source: PubMed Central journal article supplement (PMC3100992)
Supplement: 1016951108_pnas.1016951108_SI.pdf [file 1016951108_pnas.1016951108_SI.pdf]

# Supporting Information

Goldfeld et al. 10.1073/pnas.1016951108

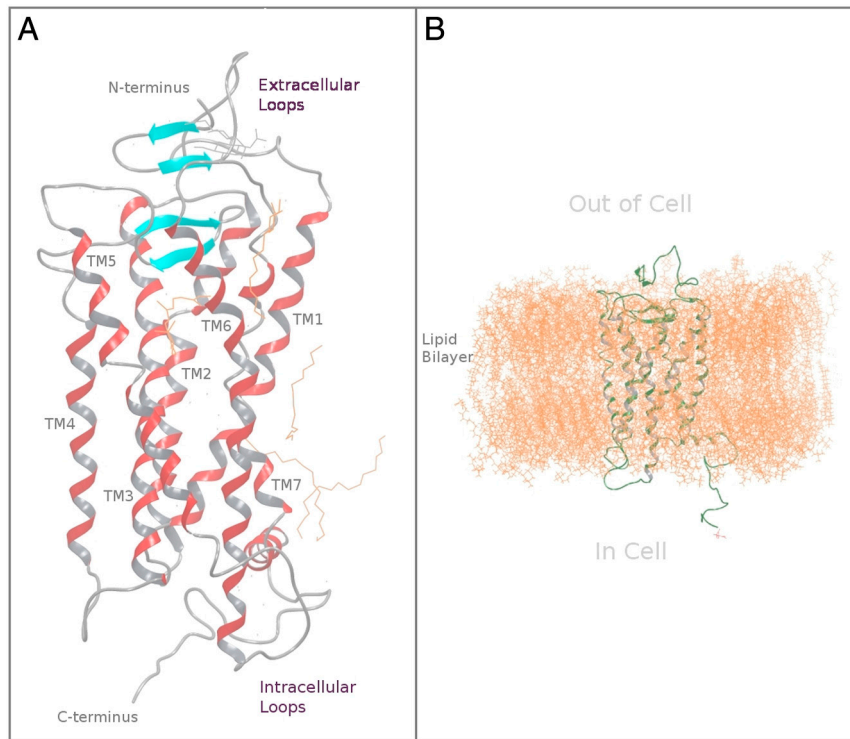

**Fig. S1.** Pictorial representations of G-protein-coupled receptors (GPCRs). (A) A cartoon of bovine rhodopsin. The red sections are the seven transmembrane helices (labeled TM1 through TM7), which are connected by gray, alternating intra- and extracellular loops. The N and C termini are also labeled. (B) A cartoon of bovine rhodopsin embedded within a lipid bilayer. When a ligand binds to the extracellular loops, it induces a conformational shift of the receptor, which triggers the intercellular domain to couple with a G-protein.
